# Supplementary material for: Diversity Competence in Healthcare: Experts’ Views on the Most Important Skills in Caring for Migrant and Minority Patients
Source: MDPI journal article supplement (doi:10.3390/soc12020043), 2022-03-09

## DELPHI STUDY – Items and quantitative Results (Round 1 and 2)

### A1. Affective Dimension

#### A1.1 Attitudes

How important for diversity-competence do you rate the following attitudes...

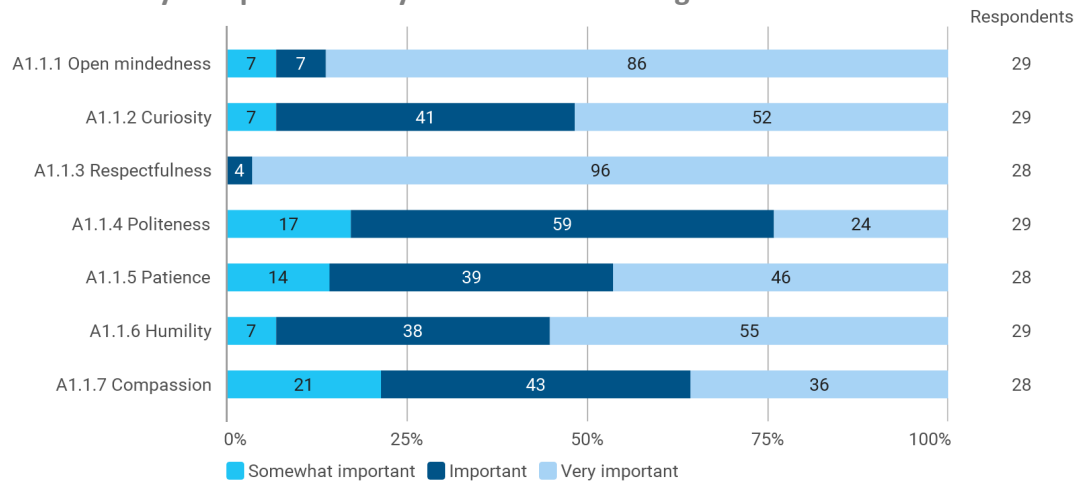

#### A1.2 Leaving one's own comfort-zone

How important for diversity competence do you rate the readiness...

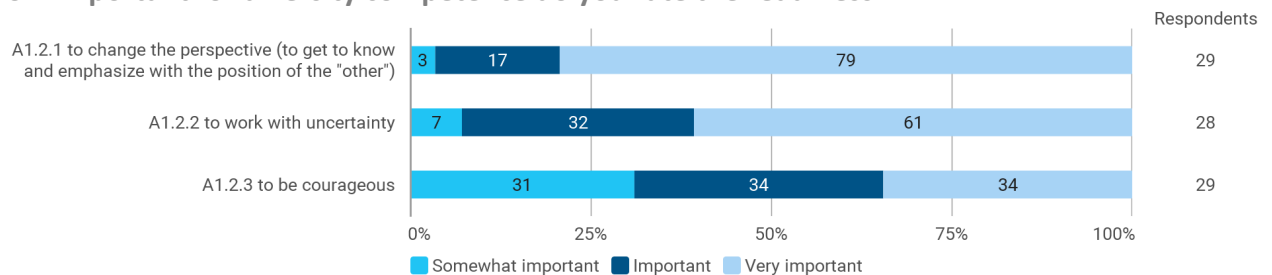

#### A1.3 Diversity-Awareness

How important is...

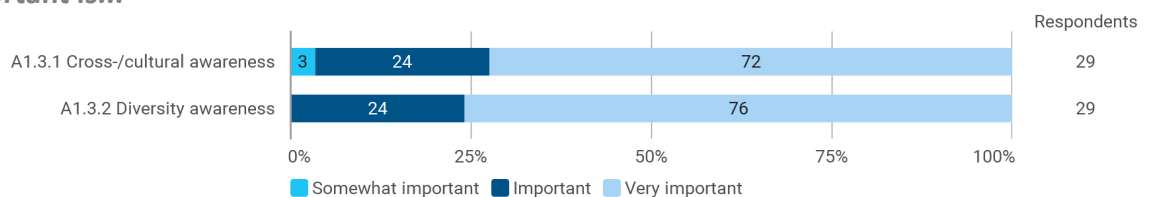

## A1.4 Self-Awareness and Reflection

How important for diversity-competency do you rate self-reflection skills on...

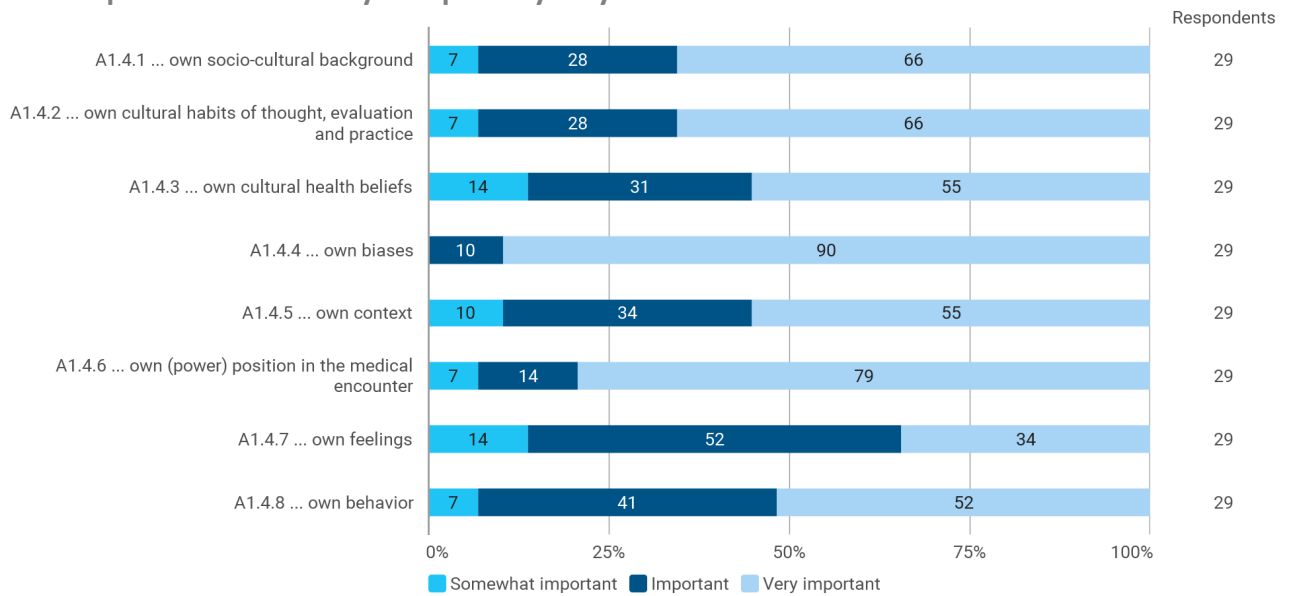

## A1.5 Avoiding generalization and depreciation

How important for diversity competency is...

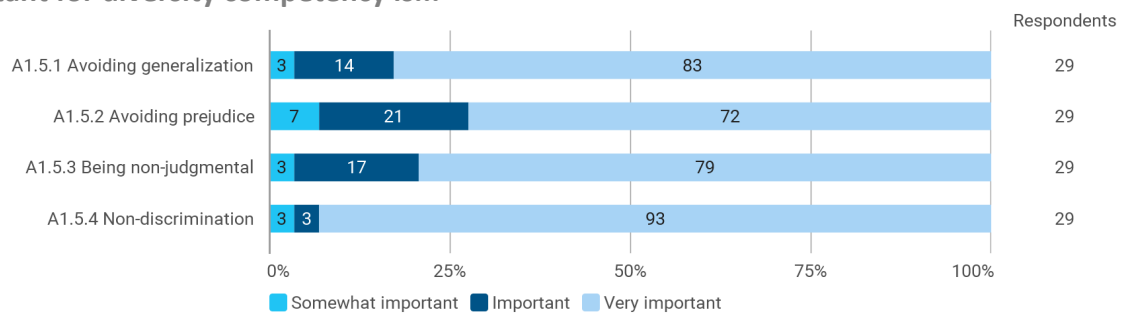

## A2. Cognitive Dimension

### A2.1 Knowledge

#### How important for diversity-competency is knowledge...

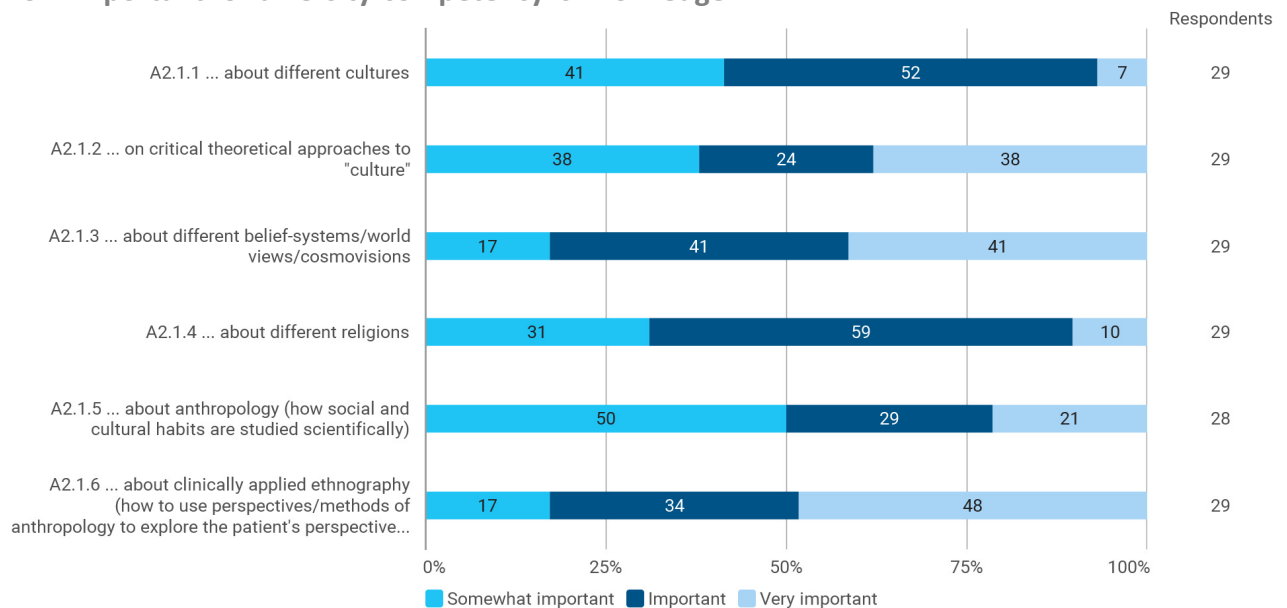

#### The panellist suggested two specific readings:

#### Do you think health professionals should be familiar with the following concepts?

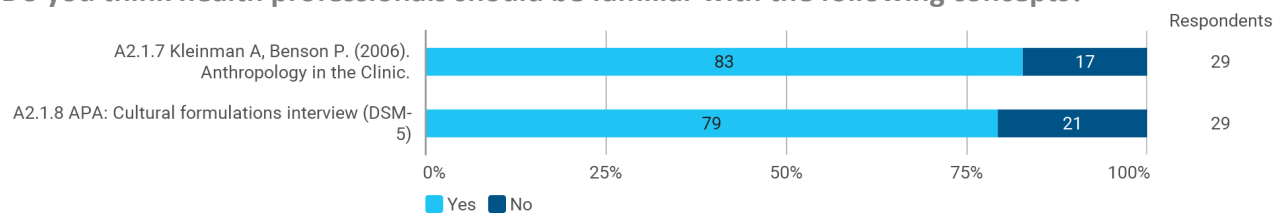

Link to Kleinman A, Benson P (2006): <https://journals.plos.org/plosmedicine/article?id=10.1371/journal.pmed.0030294>

Link to APA Cultural Formulation Interview: [https://www.google.com/search?q=APA+DSM+5+Cultural-Formulation-Interview.pdf&spell=1&sa=X&ved=2ahUKEwjBtueW\\_6ntAhXJRBUHc0qBxAQBSgAegQIBBAz&biw=1439&bih=666](https://www.google.com/search?q=APA+DSM+5+Cultural-Formulation-Interview.pdf&spell=1&sa=X&ved=2ahUKEwjBtueW_6ntAhXJRBUHc0qBxAQBSgAegQIBBAz&biw=1439&bih=666)

#### How important for diversity-competency is knowledge of migrant health differences such as...

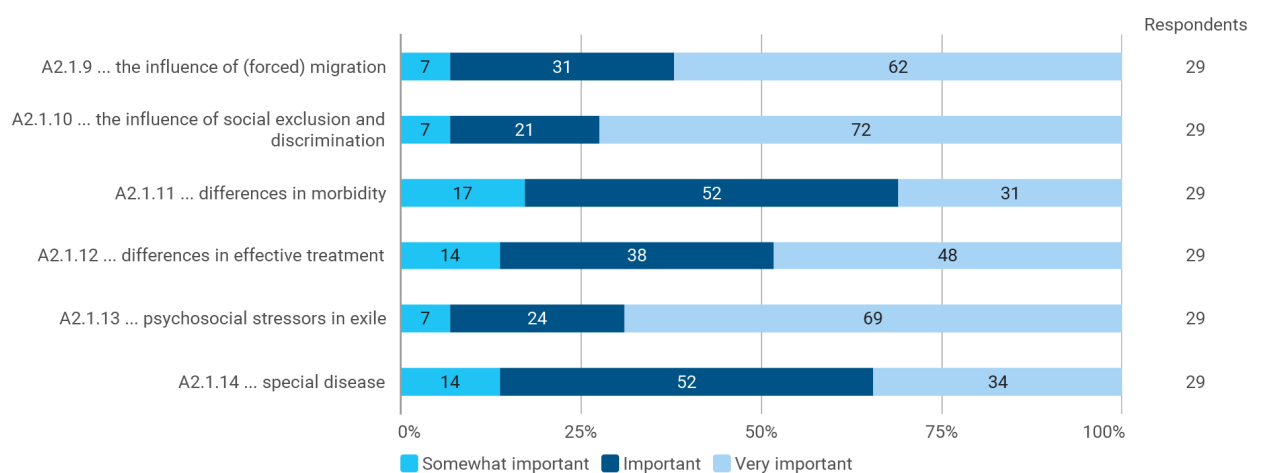

## A2.2 Structural Factors

### How important for diversity-competency is knowledge...

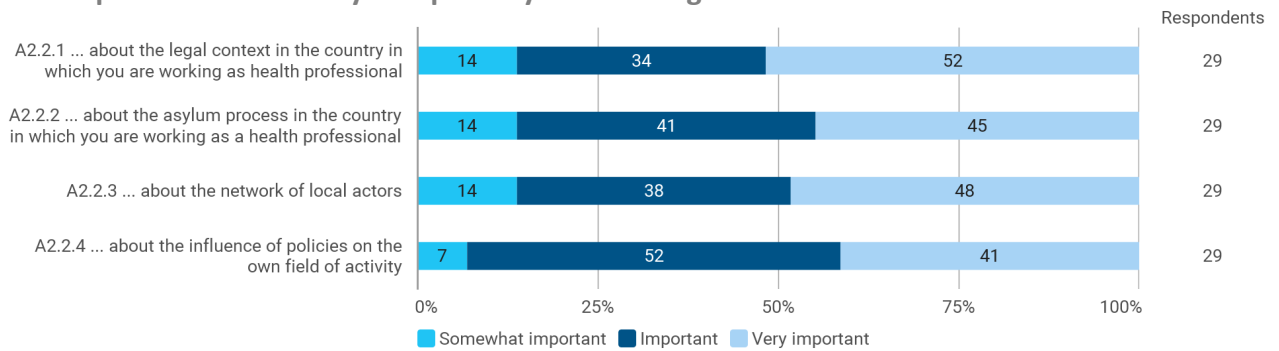

## A2.3 Public Health Approach

### How important for diversity-competency is...

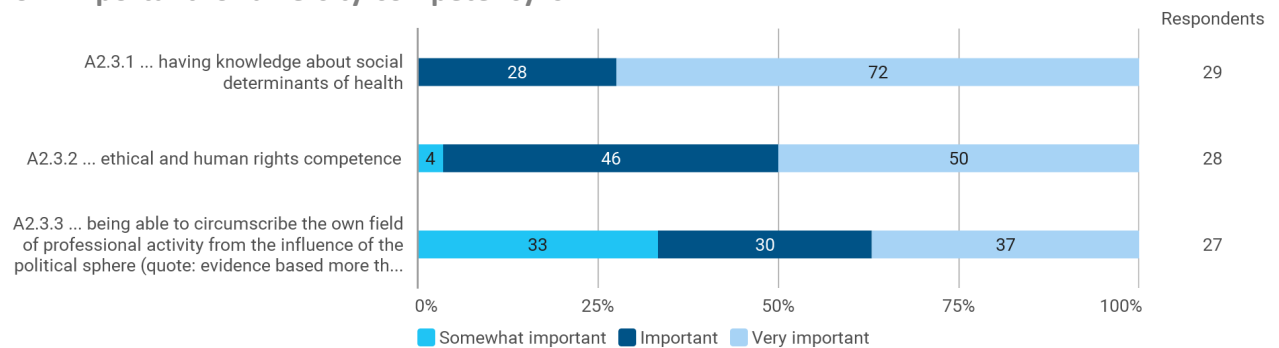

## A3. Pragmatic Dimension

### A3.1 Overcoming language barriers professionally

#### How important for diversity-competency...

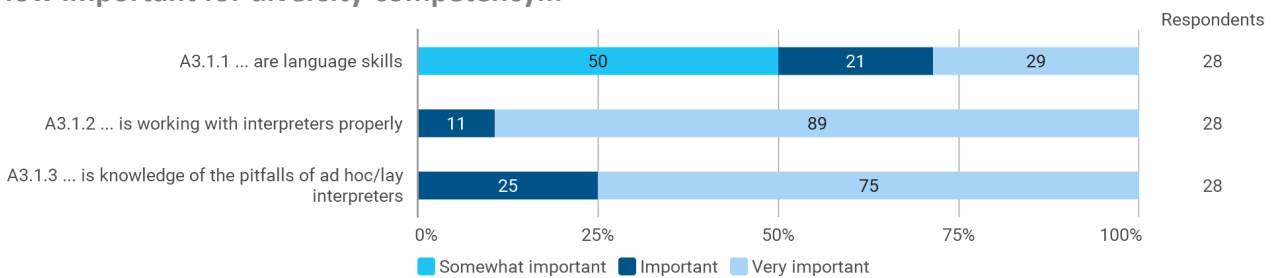

### A3.2 Listening and communication skills

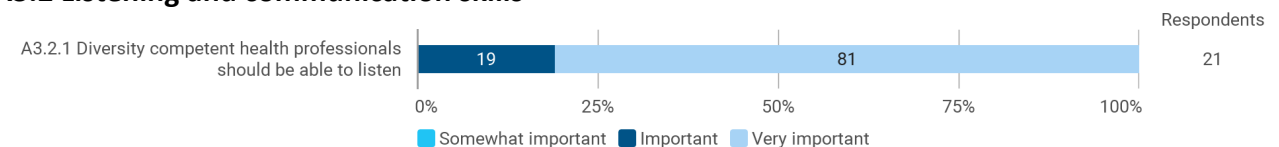

## Data S2: Generated items and quantitative results

### Diversity competent health professionals should be able to...

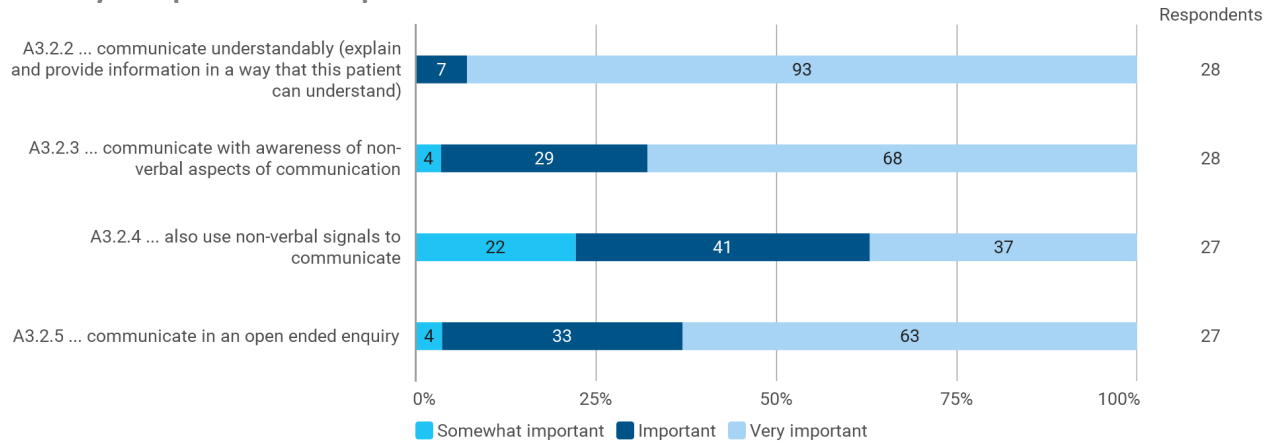

### A3.3 Proactive trans- and cross-cultural enquiries

#### How important for diversity competency do you rate the ability...

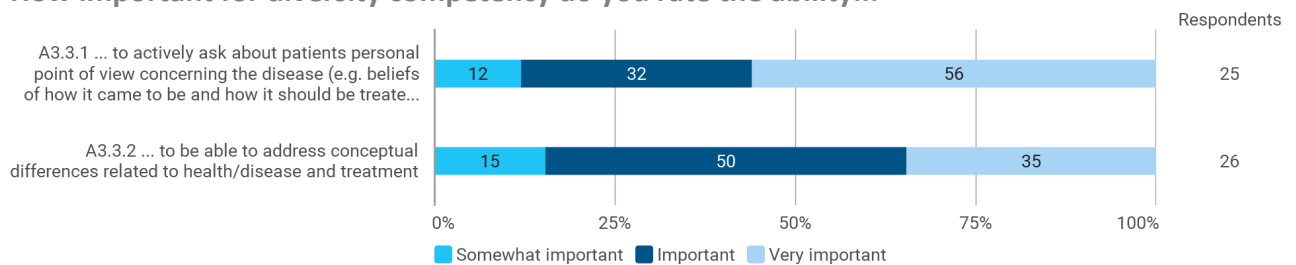

### A3.4 Flexibility and pragmatism

#### How important for diversity competency do you rate the ability...

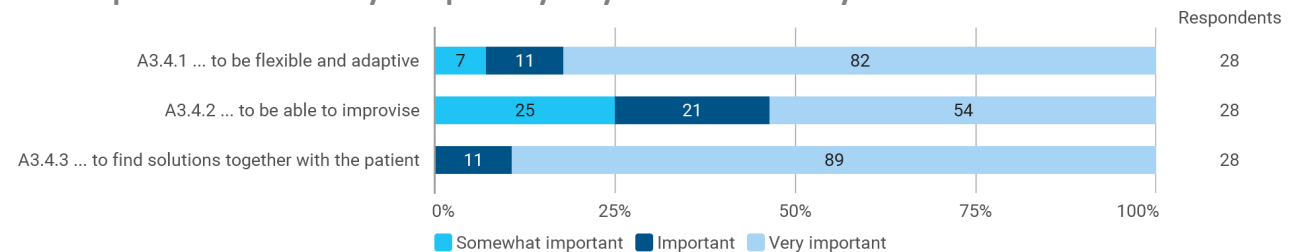

### A3.5 Patient centeredness and change of perspective

#### How important for diversity competency do you rate the ability...

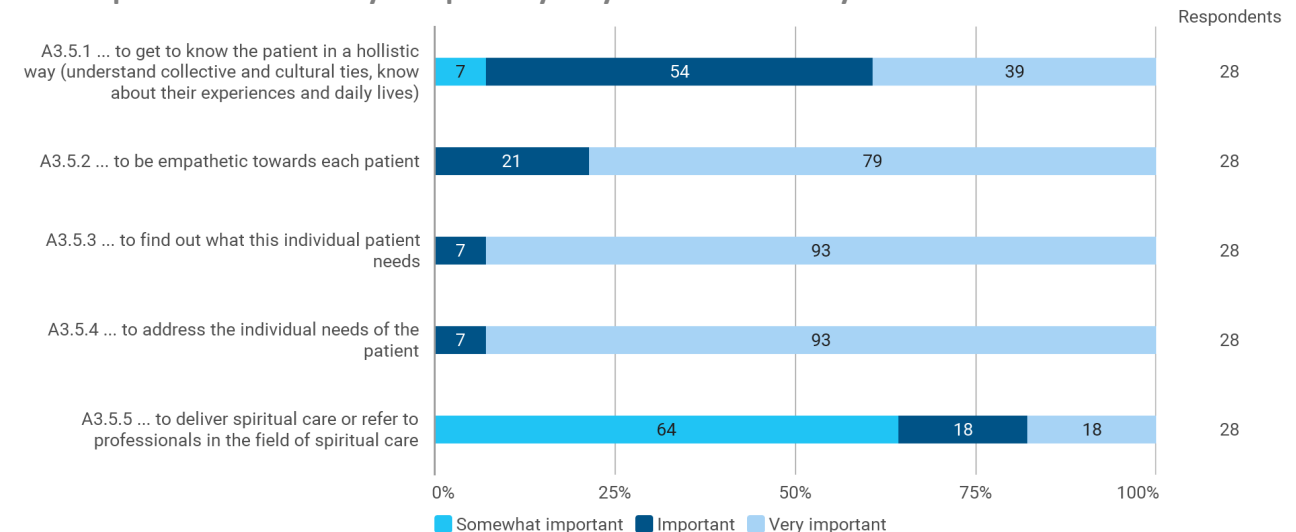

### A3.6 Stress and trauma sensitive care

How important for diversity competency do you rate the ability...

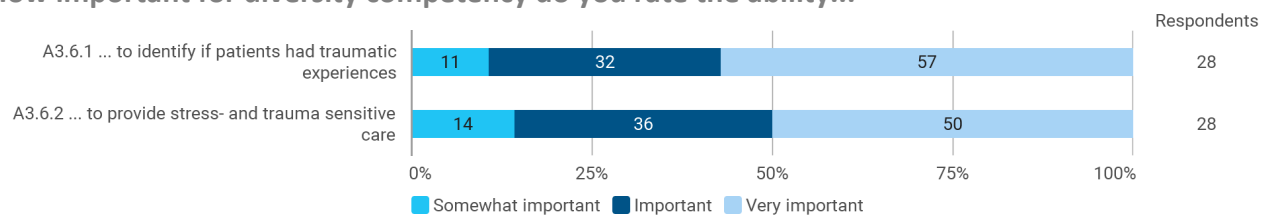

Supplement: s1 [file s1 › Supplementary2_DelphiQuestionaireResults.pdf]
