# Supplementary material for: Diversity Competence in Healthcare: Experts’ Views on the Most Important Skills in Caring for Migrant and Minority Patients
Source: MDPI journal article supplement (doi:10.3390/soc12020043), 2022-03-09
Supplement: s1 [file s1]

Archive with 2 entries (2 files):
- Supplementary1_Full_SocioDemo.pdf
- Supplementary2_DelphiQuestionaireResults.pdf
