# Supplementary material for: Diversity Competence in Healthcare: Experts’ Views on the Most Important Skills in Caring for Migrant and Minority Patients
Source: MDPI journal article supplement (doi:10.3390/soc12020043), 2022-03-09
Supplement: s1 [file s1]

Table S1 Supplementary: Characteristics of participants (full socio-demographic table)

|                                | N  | % <sup>1</sup> | Number of answers |
|--------------------------------|----|----------------|-------------------|
| <b>Age</b>                     |    |                | 28                |
| 25-34 years                    | 1  | 3.2            |                   |
| 35-44 years                    | 7  | 22.6           |                   |
| 45-54 years                    | 13 | 41.9           |                   |
| 55-64 years                    | 4  | 12.9           |                   |
| 65-74 years                    | 3  | 9.7            |                   |
| 75+                            | 0  | 0.0            |                   |
| <b>Sex</b>                     |    |                | 31                |
| Male                           | 12 | 38.7           |                   |
| Female                         | 19 | 61.3           |                   |
| Diverse                        | 0  | 0.0            |                   |
| Prefer not to say              | 0  | 0.0            |                   |
| <b>Country of origin</b>       |    |                | 29                |
| Austria                        | 1  | 3.2            |                   |
| Bulgaria                       | 2  | 6.9            |                   |
| Denmark                        | 2  | 6.9            |                   |
| France                         | 1  | 3.2            |                   |
| Germany                        | 3  | 9.7            |                   |
| Greece                         | 2  | 6.9            |                   |
| Italy                          | 1  | 3.2            |                   |
| Netherlands, The               | 1  | 3.2            |                   |
| Spain                          | 5  | 16.2           |                   |
| Sweden                         | 3  | 9.7            |                   |
| Switzerland                    | 2  | 6.9            |                   |
| United Kingdom, The            | 1  | 3.2            |                   |
| India                          | 1  | 3.2            |                   |
| Japan                          | 1  | 3.2            |                   |
| Morocco                        | 1  | 3.2            |                   |
| United States, The             | 2  | 6.9            |                   |
| <b>Country of residency</b>    |    |                | 26                |
| Austria                        | 1  | 3.8            |                   |
| Bulgaria                       | 1  | 3.8            |                   |
| Denmark                        | 4  | 12.9           |                   |
| France                         | 2  | 6.9            |                   |
| Germany                        | 5  | 16.2           |                   |
| Greece                         | 1  | 3.2            |                   |
| Italy                          | 1  | 3.2            |                   |
| Netherlands, The               | 3  | 9.7            |                   |
| Norway                         | 1  | 3.2            |                   |
| Spain                          | 3  | 9.7            |                   |
| Sweden                         | 5  | 16.2           |                   |
| Switzerland                    | 3  | 9.7            |                   |
| United Kingdom, The            | 1  | 3.2            |                   |
| <b>Highest academic degree</b> |    |                | 31                |
| MSc, MA, MD                    | 15 | 48.4           |                   |
| Phd and Dr                     | 14 | 45.2           |                   |
| Other                          | 1  | 3.2            |                   |
|                                |    |                | 31                |

<sup>1</sup> If not stated differently: 31 panellists = 100%

Table S1 Supplementary: Characteristics of participants (full socio-demographic table)

|                                                                                                                                                                                                                                                                                                                                                                                                                                      |    |            |            |
|--------------------------------------------------------------------------------------------------------------------------------------------------------------------------------------------------------------------------------------------------------------------------------------------------------------------------------------------------------------------------------------------------------------------------------------|----|------------|------------|
| <b>Disciplines (multiple possible)</b>                                                                                                                                                                                                                                                                                                                                                                                               |    |            |            |
| Medicine                                                                                                                                                                                                                                                                                                                                                                                                                             | 14 | 45.1       |            |
| Public Health                                                                                                                                                                                                                                                                                                                                                                                                                        | 3  | 9.7        |            |
| Nursing and nursing sciences                                                                                                                                                                                                                                                                                                                                                                                                         | 3  | 9.7        |            |
| Psychology                                                                                                                                                                                                                                                                                                                                                                                                                           | 2  | 6.9        |            |
| Social and cultural sciences                                                                                                                                                                                                                                                                                                                                                                                                         | 10 | 32.3       |            |
| <b>Current job position (multiple possible)</b>                                                                                                                                                                                                                                                                                                                                                                                      |    |            | 31         |
| Administrator                                                                                                                                                                                                                                                                                                                                                                                                                        | 2  | 6.9        |            |
| Teacher                                                                                                                                                                                                                                                                                                                                                                                                                              | 8  | 25.8       |            |
| Nurse                                                                                                                                                                                                                                                                                                                                                                                                                                | 2  | 6.9        |            |
| Medical doctor                                                                                                                                                                                                                                                                                                                                                                                                                       | 8  | 25.8       |            |
| Research/academic expert                                                                                                                                                                                                                                                                                                                                                                                                             | 23 | 74.2       |            |
| Diversity trainer                                                                                                                                                                                                                                                                                                                                                                                                                    | 4  | 12.9       |            |
| <b>Other (please specify)</b>                                                                                                                                                                                                                                                                                                                                                                                                        | 6  | 19.4       |            |
| <ul style="list-style-type: none"> <li>▪ PhD student in sociology, teaching at the university</li> <li>▪ Counsellor for volunteers and professionals, coordinator of peer-based health prevention program for refugees</li> <li>▪ Clinical psychologist</li> <li>▪ Project manager in IO</li> <li>▪ Additionally managing interpreting services at a hospital</li> <li>▪ Director of the medical operational support unit</li> </ul> |    |            |            |
| <b>Years of experience in this job position</b>                                                                                                                                                                                                                                                                                                                                                                                      |    |            | 29         |
| 1-4                                                                                                                                                                                                                                                                                                                                                                                                                                  | 6  | 19.4       |            |
| 5-9                                                                                                                                                                                                                                                                                                                                                                                                                                  | 3  | 9.7        |            |
| 10-14                                                                                                                                                                                                                                                                                                                                                                                                                                | 7  | 22.9       |            |
| 15-19                                                                                                                                                                                                                                                                                                                                                                                                                                | 4  | 12.9       |            |
| 20-24                                                                                                                                                                                                                                                                                                                                                                                                                                | 5  | 16.2       |            |
| 25-29                                                                                                                                                                                                                                                                                                                                                                                                                                | 1  | 3.2        |            |
| 30-34                                                                                                                                                                                                                                                                                                                                                                                                                                | 1  | 3.2        |            |
| 35-39                                                                                                                                                                                                                                                                                                                                                                                                                                | 2  | 6.9        |            |
| Min. = 2                                                                                                                                                                                                                                                                                                                                                                                                                             |    |            |            |
| Max. = 36                                                                                                                                                                                                                                                                                                                                                                                                                            |    |            |            |
| Average = 14.6                                                                                                                                                                                                                                                                                                                                                                                                                       |    |            |            |
| <b>Are you or have you previously been involved in the medical care of migrant and ethnic minority patients?</b>                                                                                                                                                                                                                                                                                                                     |    |            | 31         |
| Yes                                                                                                                                                                                                                                                                                                                                                                                                                                  | 18 | 58.1       |            |
| No                                                                                                                                                                                                                                                                                                                                                                                                                                   | 13 | 41.9       |            |
| <b>If yes to the above, for how many years have you been working with migrant and ethnic minority patients?</b>                                                                                                                                                                                                                                                                                                                      |    | 18 (=100%) | 18 (=100%) |
| 1-4                                                                                                                                                                                                                                                                                                                                                                                                                                  | 3  | 16.7       |            |
| 5-9                                                                                                                                                                                                                                                                                                                                                                                                                                  | 4  | 22.2       |            |
| 10-14                                                                                                                                                                                                                                                                                                                                                                                                                                | 1  | 5.3        |            |
| 15-19                                                                                                                                                                                                                                                                                                                                                                                                                                | 5  | 27.8       |            |
| 20-24                                                                                                                                                                                                                                                                                                                                                                                                                                | 2  | 11.1       |            |
| 25-29                                                                                                                                                                                                                                                                                                                                                                                                                                | 1  | 5.6        |            |
| 30-34                                                                                                                                                                                                                                                                                                                                                                                                                                | 0  | 0.0        |            |
| 35-39                                                                                                                                                                                                                                                                                                                                                                                                                                | 2  | 11.1       |            |

Table S1 Supplementary: Characteristics of participants (full socio-demographic table)

|                                                                                                                                                                                                                                                                                                                                                          |                                    |                                                  |                           |
|----------------------------------------------------------------------------------------------------------------------------------------------------------------------------------------------------------------------------------------------------------------------------------------------------------------------------------------------------------|------------------------------------|--------------------------------------------------|---------------------------|
| Min. = 2<br>Max. = 36<br>Average = 14.4<br><br><b>If yes to the above, how many migrant and ethnic minority patients do you see per month? (approximately)</b><br>0-10<br>11-20<br>21-30<br>31-40<br>41-50<br>51-60<br>61-100<br>More than 100<br><br>Min. = 0<br>Max. = 600<br>Average = 66                                                             |                                    |                                                  | 18 (=100%)                |
| <b>Are you involved in research activities regarding diversity?</b><br>Yes<br>No<br><br><b>How many publications (peer-reviewed articles, reports, books, etc.) have you published on diversity and/or transcultural competence topics?</b><br>None<br>1-5<br>6-10<br>More than 10                                                                       | 26<br>5<br><br>4<br>9<br>4<br>14   | 83.8<br>16.1<br><br>12.9<br>29.0<br>12.9<br>45.2 | 31<br><br><br>31          |
| <b>Are you involved in training or teaching activities regarding diversity competencies/sensitivity for health professionals? (or other professionals)</b><br>Yes<br>No<br><br><b>If yes to the above, what did your responsibilities include? (multiple possible)</b><br>Course development<br>Course implementation/teaching<br>Advisory role<br>Other | 25<br>6<br><br>23<br>25<br>13<br>0 | 80.6<br>19.4<br><br>92.0<br>100.0<br>52.0<br>0.0 | 31<br><br><br>25 (= 100%) |
